# Supplementary material for: Is clinical target volume necessary?—a failure pattern analysis in patients with locally advanced non-small cell lung cancer treated with concurrent chemoradiotherapy using intensity-modulated radiotherapy technique
Source: PubMed Central journal article supplement — Transl Lung Cancer Res. 2020 Oct;9(5):1986–95. doi: 10.21037/tlcr-20-523 (PMC7653148; doi:10.21037/tlcr-20-523), 2020-10
Supplement: tlcr-09-05-1986-dss.pdf [file tlcr-09-05-1986-dss.pdf]

## Data Sharing Statement

|                     |                                                                                                                                                    |                                                            |
|---------------------|----------------------------------------------------------------------------------------------------------------------------------------------------|------------------------------------------------------------|
| <b>Article Info</b> | <a href="http://dx.doi.org/10.21037/tlcr-20-523">http://dx.doi.org/10.21037/tlcr-20-523</a>                                                        |                                                            |
| <b>Item</b>         | <b>Question</b>                                                                                                                                    | <b>Authors' Response<br/>(place "-" if not applicable)</b> |
| 1                   | Would you like to share data collected for your study to others?                                                                                   | No.                                                        |
| 2                   | If not, would you like to share the reason for your decision?                                                                                      | -                                                          |
| 3                   | What data in particular will be shared?                                                                                                            | -                                                          |
| 4                   | Any other documents will be share? Such as study protocol, statistical analysis plan, informed consent form, clinical study report, analytic code. | Yes. Study protocol, statistical analysis plan.            |
| 5                   | When will data availability begin?                                                                                                                 | Since published online.                                    |
| 6                   | When will data availability end?                                                                                                                   | 2030.07.03.                                                |
| 7                   | To whom will you share the data?                                                                                                                   | Clinical researchers.                                      |
| 8                   | For what type of analysis or purpose?                                                                                                              | Academic discussion.                                       |
| 9                   | How or where can the data/documents be obtained?                                                                                                   | Send email to the corresponding author.                    |
| 10                  | Any other restrictions?                                                                                                                            | No.                                                        |
